# Supplementary material for: Direct Evidence of π–π Interactions in Transparent Organic–Inorganic Polymer Hybrids of Polystyrene and Silica Gel
Source: Hindawi journal article supplement (doi:10.1155/2024/8362248), 2024-04-10
Supplement: f1 [file 8362248.f1.docx]

Supplementary materials

**Direct evidence of  interactions in transparent organic-inorganic polymer hybrids of polystyrene and silica gel**

Takeru Iwamura1*, Saki Okuzumi2, Kaoru Adachi3, Masashi Takahashi1 and Masashi Shiotsuki1

1 Department of Applied Chemistry, Faculty of Science and Engineering, Tokyo City University, 1-28-1 Tamazutsumi, Setagaya-ku, Tokyo 158-8557, Japan

2 Department of Electrical Engineering and Chemistry, Graduate School of Integrative Science and Engineering, Tokyo City University, 1-28-1 Tamazutsumi, Setagaya-ku, Tokyo 158-8557, Japan

3 Faculty of Molecular Chemistry and Engineering, Kyoto Institute of Technology, Goshokaido-cho, Matsugasaki, Sakyo-ku, Kyoto 606-8585

Correspondence should be addressed to Takeru Iwamura; iwamurat@tcu.ac.jp

**Figure S1.** TG/DTA profiles of Run 1 (PSt:RSi(OMe)3=10:0).

**Figure S2.** TG/DTA profiles of Run 2 (PSt:RSi(OMe)3=10:1).

**Figure S3.** TG/DTA profiles of Run 3 (PSt:RSi(OMe)3=10:5).

**Figure S4.** TG/DTA profiles of Run 4 (PSt:RSi(OMe)3=10:10).

**Figure S5.** TG/DTA profiles of Run 5 (PSt:RSi(OMe)3=10:1).

**Figure S6.** TG/DTA profiles of Run 6 (PSt:RSi(OMe)3=10:10).
